1  
2  
3  
4  
5  
6  
7  
8  
9  
10  
11  
12  
13  
14  
15  
16  
17  
18  
19  
20  
21  
22  
23

Full Title: Sustainable elk harvests in Alberta with increasing predator populations

Short Title: Elk harvest trends in Alberta

Tyler Trump<sup>1</sup>, Kyle Knopff<sup>1,2</sup>, Andrea Morehouse<sup>1,3</sup>, Mark S. Boyce<sup>1\*</sup>

<sup>1</sup>Department of Biological Sciences, University of Alberta, Edmonton, Alberta, Canada.

<sup>2</sup>Golder Associates, Calgary, Alberta, Canada

<sup>3</sup>Winisk Research and Consulting, Pincher Creek, Alberta, Canada

\* Corresponding author

Email: [boyce@ualberta.ca](mailto:boyce@ualberta.ca) (MSB)

## 24 **Abstract**

25       Large predators often are believed to cause declines in hunter harvests of ungulates due to  
26 direct competition for prey with hunters. In Alberta, predators of elk (*Cervus elaphus*), including  
27 grizzly bear (*Ursus arctos*), cougar (*Puma concolor*), and wolf (*Canis lupus*), have increased in  
28 recent years. We used trend analysis replicated by Wildlife Management Unit (WMU) to  
29 examine regional trends in elk harvest and hunter success. Over a 26-year period, average  
30 harvest of elk increased for both unrestricted bull (5.46% yr<sup>-1</sup>) and limited-quota (6.64% yr<sup>-1</sup>)  
31 hunting seasons. Average hunter success also increased for both unrestricted bull (0.2% yr<sup>-1</sup>) and  
32 limited-quota (0.3% yr<sup>-1</sup>) seasons, but no trend was detected in hunter effort ( $P > 0.05$ ). Our  
33 results show that increasing large-predator populations do not necessarily reduce hunter harvest  
34 of elk, and we only found evidence for this in Alberta's mountain WMUs where predation on elk  
35 calves has reduced recruitment. Furthermore, data indicate that Alberta's elk harvest  
36 management has been sustainable, i.e., hunting has continued while populations of elk have  
37 increased throughout most of the province. Wildlife agencies can justify commitments to long-  
38 term population monitoring because data allow adaptive management and can inform  
39 stakeholders on the status of populations.

## 40 **Introduction**

41       Elk (*Cervus elaphus*) are an important big game species in Alberta, Canada. After being  
42 nearly extirpated from the province 100 years ago, elk populations have been restored through  
43 translocations and harvest management. Despite their importance, elk populations are  
44 infrequently monitored. Like several other jurisdictions in western North America, elk  
45 population monitoring in Alberta has been done predominately by aerial surveys [1]. Because the

46 cost of aerial monitoring is high, these surveys are conducted infrequently, typically only once  
47 every 10 years [2]. Nearly 80% of wildlife agencies across Canada and the United States collect  
48 data on harvest [3]. However, these data are seldom analyzed to permit agencies to evaluate the  
49 efficacy of their management [4].

50 A common objective for elk management is to ensure sustainable hunter harvests where  
51 continued harvest does not result in population declines. With few data available for setting  
52 regulations and quotas, harvest management strategies change little unless something appears to  
53 have gone wrong, e.g., a sharp decline in harvests or anecdotal field reports by biologists and  
54 hunters. Elk harvests in Alberta are mostly regulated by harvests under general or limited-quota  
55 licenses. General harvests, also known as open-entry harvests, do not limit the number of  
56 resident hunters who can hold this license type, but they are controlled with antler-point  
57 restrictions (APRs) that target specific age and sex classes [5]. In many Alberta WMUs elk  
58 hunters have a 3-point minimum (elk having an antler that has two tines that are 3 inches or  
59 greater projecting from a main beam) and in a few WMUs 6-point minimum (one antler must  
60 have at least five tines 3 inches or greater projecting from a main beam) APRs. General harvests  
61 with APR's can limit survival of bulls to older age classes [6,7], but are thought to offer  
62 maximum hunter yields while protecting reproductively significant cows and breeding-capable  
63 subadult males [8]. Limited-quota harvests, also known as special or limited-entry harvests,  
64 restrict the number of hunters who can participate by limiting the number of licenses to achieve a  
65 harvest quota. Licenses are distributed by random draw of applicants. By limiting licenses sold,  
66 limited-quota can limit hunter harvests, but by allowing designation of females and calves as  
67 well as males, these licenses offer wildlife managers better control over the elk population than

68 with general harvests of branch-antlered males. Other jurisdictions in North America usually  
69 have similar license restrictions although details vary.

70 Due to recent conservation efforts, large carnivore populations have been recovering in  
71 many portions of both North America and Europe, attributable to increasing human tolerance [9]  
72 and increases in ungulate prey [10]. Increases in ungulate abundance have resulted in part from  
73 legislation that aims to ensure sustainable harvests by hunting, and successes in science-based  
74 management [3]. These statements hold true in Alberta, where grizzly bear (*Ursus arctos*, [11]),  
75 cougar (*Puma concolor*, [12]), and wolf (*Canis lupus*, [13]) populations have been increasing, as  
76 have damage claims on livestock depredation [14]. With these population increases, a common  
77 belief about large predators is that they compete with hunters by decreasing ungulate populations  
78 through additive mortality [15-19], thereby resulting in decreased hunter harvest and hunter  
79 success.

80 Societal goals in the form of hunter satisfaction often accompany biological goals of a  
81 wildlife agency [20]. Aggregate hunter satisfaction can be difficult to measure because what one  
82 hunter views as a satisfactory hunt might be different for another hunter. For example, hunter age  
83 and lifetime hunting experience [21], hunter to hunter interaction and viewing harvestable  
84 wildlife [22], trophy characteristics [20, 23], and species of the hunted animal [21], can influence  
85 perception of a satisfactory hunt. Quantifiable measures of satisfaction commonly collected by  
86 wildlife agencies include hunter success and hunter effort [24, 25], with success being defined as  
87 a kill of the target species and hunter effort defined as the number of days spent hunting.

88 Alberta has collected hunter harvest and success data for elk but has not evaluated the  
89 results of regulations or trends, particularly in context of growing predator populations.

90 Therefore, our objective was to assess the results of Alberta's hunter harvest, hunter success, and

91 hunter effort in relation to the increasing predator populations within the province. We envisage  
92 two questions that can be answered from an analysis of these hunter-harvest data: (1) has harvest  
93 management been sustainable? and (2) have elk harvests declined because of increasing large  
94 predator populations? To evaluate the trend in hunter harvest and hunter success, we examined  
95 harvest data from 1995 to 2020 collected by Alberta Environment and Parks (AEP) [26].  
96 Because of increases in the populations of all three of Alberta's large predators, we expected to  
97 find a declining trend in total harvest and hunter success.

## 98 **Study area**

99 For purposes of wildlife management, the province of Alberta is divided into Wildlife  
100 Management Units (WMU), legislatively recognized areas of land for which harvest regulations  
101 are designated. There are currently 189 WMUs in Alberta and 148 of those have regulated elk  
102 harvests. WMUs throughout the province have gone through many border adjustments over time,  
103 resulting in more WMUs currently than in the past. However, during the time frame of our study  
104 (1995-2020) WMUs have remained mostly constant. WMUs can be grouped into larger Zones  
105 that coarsely mimic natural ecological regions and sub-regions of Alberta [27]. These 5 zones  
106 include the Prairie (Zone 1), Parkland (Zone 2), Foothills (Zone 3), Mountain (Zone 4), and  
107 Northern Boreal WMU's (Zone 5) (Table 1). Hunting is prohibited in Jasper, Banff, Waterton  
108 Lakes, and Wood Buffalo National Parks as well as most provincial parks and recreation areas.  
109 Areas with no licensed hunter harvests were excluded from our analysis.

110

111

112 **Table 1. Alberta’s 5 Zones separated by Natural Region, defining characteristics, and total**  
 113 **elk harvest and hunter success. For a more detailed description of each Zone, use the**  
 114 **Natural Regions and Subregions of Alberta (Natural Regions Committee 2006).**

| Zone and WMU’s                                                                         | Natural Region/km <sup>2</sup>                                                                                                    | Defining Characteristics                                                                                                                                                                                        | Total Harvest (H) and Annual Hunter Success (S) by Harvest type |                               |
|----------------------------------------------------------------------------------------|-----------------------------------------------------------------------------------------------------------------------------------|-----------------------------------------------------------------------------------------------------------------------------------------------------------------------------------------------------------------|-----------------------------------------------------------------|-------------------------------|
|                                                                                        |                                                                                                                                   |                                                                                                                                                                                                                 | General<br>1995-2020                                            | Limited quota<br>1995-2019    |
| <b>Zone 1:</b><br><b>Prairie</b><br><b>WMU’s</b><br>- 100’s<br>- 732                   | Grassland<br>Natural Region<br>- 95,565 km <sup>2</sup>                                                                           | - Level plains and rolling hills<br>- Mixed grasses<br>- Few rivers and lakes                                                                                                                                   | - H: 401<br>- S:<br>10.32%                                      | - H: 7,594<br>- S:<br>49.26%  |
| <b>Zone 2:</b><br><b>Parkland</b><br><b>WMU’s</b><br>- 200’s<br>- 728,730,<br>936      | Parkland Natural<br>Region<br>- 60,747 km <sup>2</sup>                                                                            | - Rolling hills<br>- Grasslands and aspen stands<br>- Mostly cultivated                                                                                                                                         | - H: 6,690<br>- S: 9.30%                                        | - H: 5,968<br>- S:<br>32.80%  |
| <b>Zone 3:</b><br><b>Foothills</b><br><b>WMU’s</b><br>- 300’s                          | Foothills Natural<br>Region<br>- 66,436 km <sup>2</sup>                                                                           | - Rolling hills to mountainous<br>- Mixed forests                                                                                                                                                               | - H: 39,336<br>- S: 7.76%                                       | - H: 34,810<br>- S:<br>34.06% |
| <b>Zone 4:</b><br><b>Mountain</b><br><b>WMU’s</b><br>- 400’s                           | Rocky Mountain<br>Natural Region<br>- 49,070 km <sup>2</sup>                                                                      | - Mountainous, deep valleys, elevated meadows<br>- Mixed forests, open grasslands, barren mountain tops                                                                                                         | - H: 4,456<br>- S: 4.18%                                        | - H: 2,983<br>- S:<br>22.13%  |
| <b>Zone 5:</b><br><b>Northern</b><br><b>Boreal</b><br><b>WMU’s</b><br>- 500’s<br>- 841 | Boreal Forest<br>Natural Region<br>- 381,046 km <sup>2</sup><br><br>Canadian Shield<br>Natural Regions<br>- 9,719 km <sup>2</sup> | Boreal Forest<br>- Flat plains and rolling hills<br>- Mixed forests<br>- Numerous wetlands<br>Canadian Shield<br>- Rolling hills of exposed bedrock<br>- Forests where possible<br>- Lichens, mosses, and ferns | - H: 10,807<br>- S:<br>11.06%                                   | - H: 13,171<br>- S:<br>27.00% |

## 115 **Methods**

### 116 **Large carnivore abundance**

117 We used data from government reports and previously published studies of large  
118 carnivore populations in Alberta to document changes in abundance and distribution. We  
119 inferred cougar and wolf population growth in Alberta using provincial human-caused mortality  
120 data for cougars during 1971-2010 [12] and trapping data for wolves during 1985-2006 [13]. We  
121 reviewed provincial records and the literature for estimates of Alberta grizzly bear abundance  
122 during the period of this study (1999 – 2016). Species status assessments for grizzly bears were  
123 published in 2002 and 2010 [28, 29] and an updated recovery plan in 2021 [30]; these documents  
124 provide information on the overall density, distribution, and abundance of grizzly bears in the  
125 province (Fig 1).

126

127 **Fig 1. Wildlife Management Units of Alberta, Canada by Wildlife Management Area/Zone.**  
128 **Overlaid are Alberta's seven grizzly bear management areas (BMAs). BMAs with stable or**  
129 **increasing grizzly bear populations are denoted by black hatched fill.**

130

### 131 **Harvest estimates**

132 We obtained data on estimated elk harvests from 1995-2020 from AEP [26]. All  
133 estimates were based on hunter responses to harvest surveys that were delivered post-harvest to  
134 people who bought a hunting license, although survey methods varied among years. From 1995  
135 to the early 2000s surveys were delivered to hunters by post or by telephone. In the mid to late  
136 2000s, AEP shifted to a combination of email and mail-in surveys that have persisted past 2017.

137 No harvest estimates were available prior to 1995. Hunters were encouraged, but not required, to  
138 complete post-harvest surveys resulting in a degree of non-response. AEP has accounted for this  
139 non-response by using data from hunters who did respond and extrapolating to the remaining  
140 hunter population. This assumes that the proportion of harvest success among hunters who  
141 responded is the same as those who did not respond and that the surveys are representative of  
142 Alberta's actual hunter harvest and success. Even if a bias exists because of this assumption so  
143 long as it remained roughly equivalent over time the assumption would have little consequence  
144 to our analysis. Harvest surveys also were used to obtain a record of the number of days that  
145 each hunter spent hunting. Surveys also provided data on whether the hunt was successful or not,  
146 and if the hunt was successful, data were collected on the class of animal harvested (e.g., bull,  
147 cow, or juvenile).

## 148 **Trend estimates**

149 We digitized the history of hunting regulations 1970-2020 for each WMU, as well as  
150 beginning and end dates for each harvest season. We compiled the estimated elk harvest and  
151 hunter success for each WMU from the harvest surveys between 1995-2020 [26] to link elk  
152 harvested with the respective general and limited-quota regulations. Lastly, we applied the  
153 respective Zone designation (1-5) to each WMU.

154 We used linear regression of harvest as a function of time to estimate trends in harvest  
155 and Spearman rank to assess trend in hunter harvest and success across time for both general and  
156 limited-quota harvests. Trends for individual WMUs would be temporally autocorrelated for  
157 each of these relations, thus we used a method similar to route regression [32, 33], where  
158 replication within a zone was obtained by an analysis of slopes by WMU. Average slopes can



159 then be compared to an expectation of no change, i.e., zero slope, or comparisons can be made  
160 using a t-test [32].

## 161 **Results**

### 162 **Large Carnivore Abundance**

163 Mortality data for cougars clearly demonstrate range expansion in Alberta out of the  
164 mountains and into other natural regions [12] and strongly suggest that populations have  
165 increased after 1970 when systematic persecution had reduced cougars to low levels.

166 Similarly, mortality data for wolves indicate a population increase between 1995 and  
167 2006 [13], following total extirpation in southern Alberta for rabies control in the 1950s when  
168 >4,200 wolves were killed mostly with toxicants [34]. After 30 years without wolves, they  
169 returned to Banff National Park in 1985 and quickly recolonized the Rocky Mountains into  
170 Montana [13,34].

171 Although mortality trends suggest an increase, the extent to which cougar and wolf  
172 populations grew during 1995-2016 is difficult to determine and we caution that human-caused  
173 mortality data also might change due to increased harvest effort [12, 13]. In the case of cougars,  
174 substantial increases in combined hunting and non-hunting sources of human-caused mortality  
175 despite declining harvest quotas during 2000-2010 [12] strongly indicate cougar population  
176 growth during the period over which we monitored elk harvest. Although we were able to infer  
177 an increase in populations of cougars and wolves during the period of our study, the magnitude  
178 of increase could not be estimated.

179 In 2000, the estimated provincial grizzly bear population (excluding bears in national  
180 parks) was estimated to be 841 [28]. Biologists estimated between 175 and 185 bears in

181 Alberta's national parks, bringing the total 2000 provincial estimate to between 1,016 and 1026  
182 grizzly bears [28]. This number represented an increasing provincial trend since the late 1980s  
183 [28]. The next provincial estimate was released in 2010 and was based on a series of DNA-based  
184 population inventories [29]. The 2010 grizzly bear status assessment estimated 691 grizzly bears  
185 in Alberta plus additional bears in portions of Banff and Jasper National Parks [29]. The most  
186 current DNA-based provincial DNA-based estimates were released in early 2021 and indicate  
187 there are >750 grizzly bears outside national parks in Alberta [30]. Provincial estimates indicate  
188 a stable or increasing population trend [30]. In particular, between 2008 and 2018 Bear  
189 Management Areas (BMAs) 3 and 4 have had large increases in grizzly bear abundance – annual  
190 population rate of increase of 7% and 6% respectively [31, 50]. These BMAs are largely in the  
191 Mountain Zone 4 WMUs.

## 192 **Regulations**

193 Before 1973, regulations in Alberta allowed harvest of both antlered and antlerless elk  
194 during general seasons [35]. Between 1973 and 1987 the first antler point-based system, a 5-  
195 point antler minimum general season, was introduced and was replaced in 1988 with either a 6-  
196 point or a 3-point resident/6-point nonresident general season. Over the next few years, all  
197 WMUs independently lost the resident and nonresident general harvest designations and all  
198 WMUs with general seasons had 6-point or 3-point APRs. To limit the female elk harvest in  
199 1975, the antlerless general season became either an archery-only general season or a limited-  
200 quota season and has remained that way since.

## 201 **Harvest: temporal and spatial**

202 During our study period, 126,215 elk were harvested in Alberta during general and  
203 limited-quota seasons (Table 2). While the two types of hunting seasons resulted in similar

204 harvest numbers of elk, approximately 62,000 for general and 64,000 for limited-quota, the  
205 composition of harvest under each regulation type was different, with general-season harvests  
206 being primarily bulls and limited-quota harvests being primarily cows and calves.

207

208

209 **Table 2. Total number of elk harvested 1995-2020 for general licenses in Alberta, Canada,**  
210 **and for limited-quota licenses for 1995-2019.**

| <b>Regulation</b>                                | <b>Bulls</b>    | <b>Cows</b>     | <b>Juveniles</b> | <b>Total Elk / Regulation</b> |
|--------------------------------------------------|-----------------|-----------------|------------------|-------------------------------|
| <b>General (including General Archery)</b>       | 56,704<br>(92%) | 4312<br>(7%)    | 674<br>(1%)      | 61,690<br>(100%)              |
| <b>Limited quota (including Special Archery)</b> | 6,220<br>(10%)  | 51,070<br>(79%) | 7,235<br>(11%)   | 64,525<br>(100%)              |
| <b>Total Elk / Class</b>                         | 62,924          | 55,382          | 7,909            | 126,215                       |

211

212 The number of elk harvested provincially, for both general and limited-quota seasons, has  
213 trended upwards indicating that harvests were sustainable (Fig 2). The average harvest in general  
214 seasons increased by 5.46% annually, with a ranked correlation between harvest and year,  $r_s =$   
215 0.70. Harvests in limited-quota hunts increased by 6.64% annually, with a very high ranked  
216 correlation between harvest and year,  $r_s = 0.94$ .

217

218 **Fig 2. Total estimated elk harvest in Alberta by year for general and limited-quota harvests**  
219 **from 1995 to 2020 across all wildlife management units.**

220

221 Across all years of analysis, most of the elk were harvested in the foothills and boreal  
222 (zones 3 and 5) with 39,336 (63.76%) and 10,807 (17.52%) elk taken respectively during general  
223 seasons and 34,810 (53.95%) and 13,171 (20.41%) elk, respectively during limited-quota  
224 seasons (Table 1). Zones 1, 2, and 4 accounted for 401 (0.65%); 6,690 (10.85%); and 4,456  
225 (7.22%) elk respectively in the general elk harvest, while Zones 1, 2, and 4 accounted for 7,594  
226 (11.77%); 5,968 (9.25%); and 2,983 (4.62%) elk respectively during limited-quota seasons.

## 227 **Hunter success and effort: temporal and spatial**

228 The mean annual hunter success rate was 9.2% during general seasons and 33.5% for  
229 limited-quota seasons, each trending upwards over time (Fig 3). General-season hunter success  
230 increased by 0.002 annually, with a significant correlation between hunter success and year,  $r_s =$   
231 0.67. For limited-quota seasons, hunter success increased by 0.003 annually, also with a  
232 significant ranked correlation between hunter success and year,  $r_s = 0.51$ . These trends in hunter  
233 success were not attributable to changes in hunter effort because we found no correlation  
234 between hunter effort and year ( $r_s = 0.06$ ,  $P > 0.05$ ; Fig 4).

235  
236 **Fig 3. Mean annual hunter success (%) for general and limited-quota special elk harvests**  
237 **in Alberta from 1995 to 2020 across all Wildlife Management Units.**

238 **Fig 4. Annual hunter effort (total harvest per number of days hunted) for Alberta's**  
239 **licensed elk hunters from 1995 to 2020. We found no temporal trend in hunter effort ( $P >$**   
240 **0.05).**

241 For the five natural regions, Zone's 5 and 1 had the highest mean hunter success for  
242 general seasons at 11.1% and 10.3%, respectively, while Zones 2 (9.3%), 3 (7.8%), and 4 (4.2%)  
243 had somewhat lower mean hunter success (Tables 1 and 3). Zone 1 had the highest mean hunter

244 success for limited-quota seasons (49.3%). Hereafter, mean hunter success declined for limited-  
 245 quota seasons in order of Zone 3 (34.1%), 2 (32.8%), 5 (27.0%), and 4 (22.1%).

246

247 **Table 3: Slope and standard error of the mean elk hunter harvest and hunter success for**  
 248 **WMUs within each Zone for General and limited quota licenses in Alberta, Canada from**  
 249 **1995-2020.**

| Harvest Type                     | Zone                                  | Hunter Harvest |                | Hunter Success |                |
|----------------------------------|---------------------------------------|----------------|----------------|----------------|----------------|
|                                  |                                       | Mean Slope     | Standard Error | Mean Slope     | Standard Error |
| <b>General (1995-2020)</b>       | <b>Zone 1</b> - Prairie units         | 0.01           | 0.52           | 0.01           | 0.02           |
|                                  | <b>Zone 2</b> - Parkland units        | 0.47           | 0.14           | -0.003         | 0.004          |
|                                  | <b>Zone 3</b> - Foothill units        | 1.38           | 0.46           | 0.001          | 0.0004         |
|                                  | <b>Zone 4</b> - Mountain units        | -0.07          | 0.07           | -0.001         | 0.001          |
|                                  | <b>Zone 5</b> - Northern Boreal units | 1.92           | 0.59           | 0.01           | 0.003          |
| <b>Limited quota (1995-2019)</b> | <b>Zone 1</b> - Prairie units         | 2.30           | 3.96           | 0.01           | 0.03           |
|                                  | <b>Zone 2</b> - Parkland units        | 0.25           | 1.00           | -0.02          | 0.01           |
|                                  | <b>Zone 3</b> - Foothill units        | 1.34           | 0.90           | -0.006         | 0.002          |
|                                  | <b>Zone 4</b> - Mountain units        | -0.49          | 0.11           | -0.004         | 0.002          |
|                                  | <b>Zone 5</b> - Northern Boreal units | 2.40           | 0.83           | 0.01           | 0.02           |

250

## 251 Discussion

252 Although AEP has not evaluated how elk hunter harvest and hunter success has changed  
 253 in recent years, their harvest policies have been sustainable and have resulted in positive trends

254 in both harvests and hunter success over time. The number of elk hunters also has increased  
255 annually since 1995 for both general and limited-quota seasons [26]. With a rise in the number of  
256 hunters from 17,045 in 1995 to 33,355 in 2020 for general-season harvests and 2,003 in 1995 to  
257 9,880 in 2019 for limited-quota harvests [26], an increase in both elk harvested and hunter  
258 success, but with no significant change in elk hunter effort, reinforces the data indicating that  
259 Alberta's elk are increasing at the provincial scale. The exceptions are only in mountain units  
260 where there are the highest concentrations of predators.

261 From 1995 to 2020, most of the bull harvest was under general license, whereas limited-  
262 quota licenses were targeted to harvest mostly antlerless elk. In ungulate herds, bull demographic  
263 tends to have relatively little consequence for overall recruitment [2, 37, 38, 39]. For example,  
264 sex ratios of elk populations can be as skewed as 1 bull for every 25 cows, before reproductive  
265 performance is negatively influenced [40, 41]. This allows Alberta to manage its bull elk with  
266 APRs, protecting cows and juveniles while still maintaining hunter opportunity [42]. We also  
267 found that limited-quota licenses primarily are used by wildlife managers to target females and  
268 juveniles [37, 38, 39]. These limited-quota licenses are allotted to hunters in limited numbers to  
269 keep removals moderate. However, in areas having conflicts with agriculture, antlerless removals  
270 can be used to reduce herd size [5, 43, 44].

271 Surprisingly, continued increases in hunter harvest have been sustained despite increases  
272 in large-predator populations. Although both total elk harvested and predator populations are  
273 increasing provincially within Alberta, one exception was found in Zones 4 (Table 3) where elk  
274 harvests declined during 1995-2020.

275 We believe that declines in the mountain units (Zone 4) might be attributed to continued  
276 disruption of migration routes by roads and industrial development [45, 46, 47, 48], and to

277 predation, especially by grizzly bears [49, 50]. Grizzly bear predation on calves has increased in  
278 recent years [50], which is attributable to increases in the grizzly bear population in the mountain  
279 zones of Alberta [11, 30, 51, 52], thereby reducing elk recruitment [50, 53]. The mountain  
280 WMUs are the only units in Alberta where our initial prediction of reduced elk harvest as a result  
281 of increasing predator densities was supported and it is these mountain WMUs where combined  
282 wolf, cougar, and grizzly bear numbers are highest [11-14].

283         The ruggedness of terrain and thickness of vegetation reduces hunter access by increasing  
284 effort required by the hunter and decreasing the visibility of the prey animal [54, 55], whereas  
285 road access can increase densities of hunters [56]. Separating WMU's by natural region allowed  
286 us to examine the relationships between landscape and habitat and hunter harvest and success.  
287 The landscapes and vegetation among the 5 natural regions vary from mountains to plains and  
288 trees to grasslands. As an example of how topography and habitat might affect hunter success  
289 and harvest, the open, grassy-plains habitats of the Prairie Zone (Zone 1) had one of the greatest  
290 annual mean hunter success rates for both general and limited-quota seasons, yet still having the  
291 lowest total harvest. High hunter success can be explained by high visibility, which limits  
292 opportunities for elk to escape [55]. While most of the elk harvest in Zone 1 comes from limited-  
293 quota licenses, low numbers also can be explained by the limited vegetation cover and flat  
294 terrain, which provide little habitat security leaving few elk left for harvest [54]. The Foothills  
295 (Zone 3) is characterized by rolling hills and mixed forests where more elk were harvested than  
296 all the other Zones combined. This area provides optimal habitat for elk with a balance of habitat  
297 security and forage in the form of forest patches and grasslands, and it encompasses many known  
298 wintering areas for of Alberta's migratory elk herds that summer in the mountains [45, 46, 47,  
299 48].

300 Long-term monitoring programs by wildlife agencies often are justified for informing  
301 stakeholders [57], avoiding conflicts [3], and for evaluating the results of management  
302 interventions to improve techniques [58, 59]. Our study highlights the importance of evaluating  
303 the results of monitoring data such as harvest surveys, despite a paucity of data about population  
304 size. Greater detail about trends in abundance could be obtained by increasing the frequency of  
305 aerial surveys [1, 2] or by conducting surveys of hunter observations [60, 61, 62]. Although  
306 aerial surveys of elk in Alberta have been too infrequent to provide adequate monitoring, when  
307 combined with trends in harvests distributed among WMUs, clearly Alberta's harvest  
308 management is sustainable. Despite increasing numbers of elk hunters and large carnivores in  
309 Alberta, both the number of elk harvested and hunter success has been increasing throughout the  
310 province except in mountain WMUs (Zone 4).

## 311 **Management implications**

312 Increasing harvests and abundance of elk indicates that AEP is managing elk sustainably  
313 within the province overall. Further, we found that increasing large predator populations do not  
314 necessarily equate to a loss in prey populations at the provincial scale. If habitats are sufficient to  
315 support a larger prey population, then the prey population should be able to support a larger  
316 population of predators [14, 63]. For example, in Alaska as prey populations increased, wolf  
317 territory size decreased, leaving more room for additional wolf packs [64]. Nevertheless, a  
318 growing elk population might be cause for concern for management of other ungulates. In recent  
319 years, Alberta's elk, moose, and deer populations have increased because of early successional  
320 habitats created by industrial development, but woodland caribou (*Rangifer tarandus caribou*)  
321 populations have been in decline [65]. These changes have been linked to increasing predator  
322 populations, such as wolves and cougars [12], for which population trends have been



323 subsequently linked to Alberta's increasing populations of alternative prey. Known as apparent  
324 competition [66], a possible additive effect on the decline of woodland caribou could be that  
325 some ungulate populations are growing substantially enough that they are indirectly causing a  
326 decline of woodland caribou by increasing the prey base for wolves. This has led some to  
327 speculate that closer management of these increasing ungulate populations might need to be  
328 considered when trying to manage predators that are negatively affecting at-risk ungulate  
329 populations [67]. Thus, continued vigilance is required, specifically to protect migration routes  
330 for elk into western mountains [47]. Yet, elk in Alberta outside of the mountain units are  
331 thriving, and harvest management has been adequate to ensure viable and sustainable herds  
332 throughout the province. Moreover, large carnivore populations have increased due to reduced  
333 persecution and increased populations of prey [10].

## 334 **Acknowledgements**

335 We thank Mariana Nagy-Reis for support and input in the preparation of this manuscript,  
336 along with AEP biologists Cassandra Hardie, Anne Hubbs and Greg Hale who helped collect and  
337 interpret data. We also are appreciative of the many staff, past and present, of Alberta  
338 Environment and Parks who collected the elk harvest data.

## 339 **References**

- 340 1. Allen JR, McInenly LE, Merrill EH, Boyce MS. Using resource selection functions to  
341 improve estimation of elk population numbers. *J Wild Manage.* 2008; 72:1798–804.
- 342 2. Boyce MS, Baxter PW, Possingham HP. Managing moose harvests by the seat of your  
343 pants. *Theor Popul Biol.* 2012; 82:340–7.

- 344 3. Mahoney S, Geist V. The North American model of wildlife conservation. Baltimore,  
345 MD: Johns Hopkins Univ Press, 2019.
- 346 4. Yoccoz NG, Nichols JD, Boulinier T. Monitoring of biological diversity in space and  
347 time. *Trends Ecol Evol.* 2001; 16:446–53.
- 348 5. Wallingford BD, Diefenbach DR, Long ES, Rosenberry CS, Alt GL. Biological and  
349 social outcomes of antler point restriction harvest regulations for white-tailed deer. *Wildl.*  
350 *Monogr.* 2017; 196:1–26.
- 351 6. Bender LC, Miller PJ. Effects of elk harvest strategy on bull demographics and herd  
352 composition. *Wildl Soc Bull.* 1999; 27:1032–7.
- 353 7. Bender LC. Effects of bull elk demographics on age categories of harem bulls. *Wildl Soc*  
354 *Bull.* 2002; 30:193–9.
- 355 8. Prothero WL, Spillett JJ, Balph DF. Rutting behavior of yearling and mature bull elk:  
356 some implications for open bull hunting. In: Boyce MS, Hayden-Wing LD, editors. *North*  
357 *American elk: ecology, behavior and management.* University of Wyoming, Laramie,  
358 Wyoming, USA; 1979. p. 160–5.
- 359 9. Lischka SA, Teel TL, Johnson HE, Crooks KR. Understanding and managing human  
360 tolerance for a large carnivore in a residential system. *Biol Conserv.* 2019; 238:108189.
- 361 10. Boitani L, Linnell JDC. Bringing large mammals back: large carnivores in Europe. In:  
362 Pereira HM, Navarro LM, editors. *Rewilding European landscapes,* New York, NY:  
363 Springer; 2015, p 67–84.
- 364 11. Morehouse AT, Boyce MS. Grizzly bears without borders: spatially explicit capture–  
365 recapture in southwestern Alberta. *J Wildl Manage.* 2016; 80:1152–66.

- 366 12. Knopff KH, Webb NF, Boyce MS. Cougar population status and range expansion in  
367 Alberta during 1991–2010. *Wildl Soc Bull.* 2014; 38:116–21.
- 368 13. Robichaud CB, Boyce MS. Spatial and temporal patterns of wolf harvest on registered  
369 traplines in Alberta, Canada. *J Wildl Manage.* 2010; 74:635–43.
- 370 14. Morehouse AT, Tigner J, Boyce MS. Coexistence with large carnivores supported by a  
371 predator-compensation program. *Environ Manage.* 2018; 61:719–31.
- 372 15. Miller SD, Bruce N, McLellan BN, Derocher AE. Conservation and management of large  
373 carnivores in North America. *Int J Envir Stud.* 2013; 70:383–398.
- 374 16. National Research Council. *Wolves, bears, and their prey in Alaska: biological and social  
375 challenges in wildlife management.* Washington, DC: National Academies Press; 1997.
- 376 17. Meadow R, Reading RP, Phillips M, Mehringer M, Miller BJ. The influence of  
377 persuasive arguments on public attitudes toward a proposed wolf restoration in the  
378 southern Rockies. *Wildl Soc Bull.* 2005; 33:154–63.
- 379 18. Jacques CN, Van Deelen TR. Impacts of predators on white-tailed deer population  
380 growth and recruitment in Wisconsin. Madison, WI: Wisconsin Department of Natural  
381 Resources; 2010:1–26.
- 382 19. Clark SG, Cherney DN, Clark DO. Large carnivore conservation: a perspective on  
383 constitutive decision making and options. In: Clark SG, Rutherford MB, editors. *Large  
384 carnivore conservation: integrating science and policy in the North American West.*  
385 Chicago, IL: University of Chicago Press; 2014. p. 251–88.
- 386 20. Decker DJ, Brown TL, Gutierrez RJ. Further insights into the multiple-satisfactions  
387 approach for hunter management. *Wildl Soc Bull.* 1980; 8:323–31.

- 388 21. Hazel KL, Langenau Jr EE, Levine RL. Dimensions of hunting satisfaction: multiple  
389 satisfactions of wild turkey hunting. *Leisure Sci.* 1990; 12(4):383–93.
- 390 22. Gigliotti LM. A classification scheme to better understand satisfaction of Black Hills deer  
391 hunters: the role of harvest success. *Hum Dimen Wildl.* 2000; 5:32–51.
- 392 23. Monteith KL, Long RA, Stephenson TR, Bleich VC, Bowyer RT, Lasharr TN. Horn size  
393 and nutrition in mountain sheep: can ewe handle the truth? *J Wildl Manage.* 2018; 82:67–  
394 84.
- 395 24. Heberlein TA. Peer-reviewed articles too many hunters or not enough deer? *Human and*  
396 *biological determinants of hunter satisfaction and quality.* *Hum Dimen Wildl.* 2002;  
397 7:229–50.
- 398 25. Skalski JR, Townsend RL, Gilbert BA. Calibrating statistical population reconstruction  
399 models using catch-effort and index data. *J Wildl Manage.* 2007; 71:1309–16.
- 400 26. Alberta Environment and Parks. FWMIS Elk Harvest Data. Fish and Wildlife  
401 Management Information System (FWMIS). Edmonton, AB, CA: Alberta Environment  
402 and Parks; 2021.
- 403 27. Natural Regions Committee. Natural regions and subregions of Alberta. Downing DJ,  
404 Pettapiece WW, editors. Edmonton, AB, CA: Government of Alberta; 2006. Pub. No.  
405 T/852.
- 406 28. Kansas JL. Status of the grizzly bear (*Ursus arctos*) in Alberta. Alberta Sustainable  
407 Resource Development. Wildlife Status Report No. 37, Edmonton, Alberta, Canada;  
408 2002.
- 409 29. Festa-Bianchet M. Status of the grizzly bear (*Ursus arctos*) in Alberta: Update 2010.  
410 Alberta Sustainable Resource Development. Wildlife Status Report No. 37, Edmonton,

- 411 Alberta, Canada; 2010.
- 412 30. Alberta Environment and Parks. Alberta grizzly bear recovery plan. Alberta Species at  
413 Risk Recovery Plan No. 37. Edmonton, Alberta, Canada; 2020.
- 414 31. Stenhouse GB, Boulanger J, Phoebus I, Graham K, Sorensen A. Estimates of grizzly bear  
415 population size, density and distribution for Alberta's Clearwater bear management area  
416 (BMA 4) in 2018 with comparisons to 2005. Foothills Research Institute (fRI), Hinton,  
417 Alberta, Canada; 2020.
- 418 32. Geissler PH, Noon BR. Estimates of avian population trends from the North American  
419 Breeding Bird Survey. *Stud Avian Biol.* 1981; 6:42–51.
- 420 33. Thomas L, Martin K. The importance of analysis method for breeding bird survey  
421 population trend estimates. *Conserv Biol.* 1996; 10:479–90.
- 422 34. Fish and Wildlife Historical Society & Federation of Alberta Naturalists. Fish, fur &  
423 feathers: fish and wildlife conservation in Alberta 1905-2005. Altona, Manitoba: Friesens  
424 Printers; 2005.
- 425 35. Alberta Government. Alberta hunting regulation guides. Edmonton, AB, CA: Alberta  
426 Environment and Parks; 1970–2020.
- 427 36. Mawdsley JR, Organ JF, Decker DJ, Forstchen AB, Regan RJ, Riley SJ, et al. Artelle et  
428 al. (2018) miss the science underlying North American wildlife management. *Sci Adv.*  
429 2018; 4(10). doi: 10.1126/sciadv.aat8281.
- 430 37. Bender LC, Fowler PE, Bernatowicz JA, Musser JL, Stream LE. Effects of open-entry  
431 spike-bull, limited-entry branched-bull harvesting on elk composition in Washington.  
432 *Wildl Soc Bull.* 2002; 30:1078–84.

- 433 38. Mysterud A, Coulson T, Stenseth NC. The role of males in the dynamics of ungulate  
434 populations. *J Anim Ecol.* 2002; 71:907–15.
- 435 39. Bishop CJ, White GC, Freddy DJ, Watkins BE. Effect of limited antlered harvest on mule  
436 deer sex and age ratios. *Wildl Soc Bull.* 2005; 33:662–8.
- 437 40. Haigh JC, Hudson RJ. Farming wapiti and red deer. St. Louis, MO: Mosby; 1993.
- 438 41. White GC, Freddy DJ, Gill RB, Ellenberger JH. Effect of adult sex ratio on mule deer  
439 and elk productivity in Colorado. *J Wildl Manage.* 2001; 65:543–51.
- 440 42. Biederbeck HH, Boulay MC, Jackson DH. Effects of hunting regulations on bull elk  
441 survival and age structure. *Wildl Soc Bull.* 2001; 29:1271–7.
- 442 43. Giles BG, Findlay CS. Effectiveness of a selective harvest system in regulating deer  
443 populations in Ontario. *J Wildl Manage.* 2004; 68:266–77.
- 444 44. Hegel TM, Gates CC, Eslinger D. The geography of conflict between elk and agricultural  
445 values in the Cypress Hills, Canada. *J Environ Manage.* 2009; 90:222–35.
- 446 45. Benz RA, Boyce MS, Thurfjell H, Paton DG, Musiani M, Dormann CF, et al. Dispersal  
447 ecology informs design of large-scale wildlife corridors. *PLoS ONE.* 2016; 11(9):  
448 e0162989. doi: 10.1371/journal.pone.0162989.
- 449 46. Eggeman SL, Hebblewhite M, Bohm H, Whittington J, Merrill EH. Behavioural  
450 flexibility in migratory behaviour in a long-lived large herbivore. *J Anim Ecol.* 2016;  
451 85:785–97.
- 452 47. Paton DG, Ciuti S, Quinn M, Boyce MS. Hunting exacerbates the response to human  
453 disturbance in large herbivores while migrating through a road network. *Ecosphere.*  
454 2017; 8(6). doi: 10.1002/ecs2.1841.
- 455 48. Prokopenko CM, Boyce MS, Avgar T. Extent-dependent habitat selection in a migratory

- 456 large herbivore: road avoidance across scales. *Landsc Ecol.* 2017; 32:313–25.
- 457 49. Barber-Meyer SM, Mech LD, White PJ. Elk calf survival and mortality following wolf  
458 restoration to Yellowstone National Park. *Wildl Monog.* 2008; 169:1–30.
- 459 50. Griffin KA, Hebblewhite M, Robinson HS, Zager P, Barber-Meyer SM, Christianson D,  
460 et al. Neonatal mortality of elk driven by climate, predator phenology and predator  
461 community composition. *J Anim Ecol.* 2011; 80:1246–57.
- 462 51. Stenhouse GB, Boulanger J, Efford M, Rovang S, McKay T, Sorensen S, et al. Estimates  
463 of grizzly bear population size and density for the 2014 Alberta Yellowhead Population  
464 Unit (BMA 3) and south Jasper National Park. Hinton, AB, CA: fRI Research Grizzly  
465 Bear Program Report; Oct 2015. 73 p.
- 466 52. Boulanger J, Nielsen SE, Stenhouse GB. Using spatial mark-recapture for conservation  
467 monitoring of grizzly bear populations in Alberta. *Sci Repts.* 2018; 8(1):5204.  
468 doi:10.1038/s41598-018-23502-3.
- 469 53. DeCesare NJ, Hebblewhite M, Bradley M, Smith KG, Hervieux D, Neufeld L. Estimating  
470 ungulate recruitment and growth rates using age ratios. *J Wildl Manage.* 2012; 76:144–  
471 53.
- 472 54. McCorquodale SM, Wiseman R, Marcum CL. Survival and harvest vulnerability of elk in  
473 the Cascade Range of Washington. *J Wildl Manage.* 2003; 67:248–57.
- 474 55. Lebel F, Dussault C, Massé A, Côté SD. Influence of habitat features and hunter behavior  
475 on white-tailed deer harvest. *J Wildl Manage.* 2012; 76:1431–40.
- 476 56. Gratson MW, Whitman CL. Road closures and density and success of elk hunters in  
477 Idaho. *Wildl Soc Bull.* 2000; 28:302–10.

- 478 57. Campbell M, Mackay KJ. Communicating the role of hunting for wildlife management.  
479 Hum Dimen Wildl. 2009; 14:21–36.
- 480 58. Nichols JD, Williams BK. Monitoring for conservation. Trends Ecol Evol. 2006; 21:668–  
481 73.
- 482 59. McDonald-Madden E, Baxter PW, Fuller RA, Martin TG, Game ET, Montambault J, et  
483 al. Monitoring does not always count. Trends Ecol Evol. 2010; 25:547–50.
- 484 60. Ericsson G, Wallin K. Hunter observations as an index of moose *Alces alces* population  
485 parameters. Wildl. Biol. 1999; 5(1):177–85.
- 486 61. Solberg EJ, Saether BE. Hunter observations of moose *Alces alces* as a management tool.  
487 Wildl. Biol. 1999; 5(1):107–17.
- 488 62. Boyce MS, Corrigan R. Moose survey app for population monitoring. Wildl Soc Bull.  
489 2017; 41:125–8.
- 490 63. Errington PL. Of predation and life. Ames, IA: Iowa State University Press; 1967.
- 491 64. Walters CJ, Stocker M, Haber GC. Simulation and optimization models for a wolf-  
492 ungulate system. In: Fowler CW, Smith TD, editors. Dynamics of large mammal  
493 populations. New York, NY: John Wiley and Sons; 1981. p. 317–37.
- 494 65. Hervieux D, Hebblewhite M, Stepnisky D, Bacon M, Boutin S. Managing wolves (*Canis*  
495 *lupus*) to recover threatened woodland caribou (*Rangifer tarandus caribou*) in Alberta.  
496 Can J Zool. 2014; 92:1029–37.
- 497 66. Holt RD, Lawton JH. The ecological consequences of shared natural enemies. Annu Rev  
498 Ecol Syst. 1994; 25(1):495–520.
- 499 67. Latham AD, Latham MC, McCutchen NA, Boutin S. Invading white-tailed deer change  
500 wolf–caribou dynamics in northeastern Alberta. J Wildl Manage. 2011; 75:204–12.



bioRxiv preprint doi: <https://doi.org/10.1101/2022.05.23.493053>; this version posted May 23, 2022. The copyright holder for this preprint (which was not certified by peer review) is the author/funder, who has granted bioRxiv a license to display the preprint in perpetuity. It is made available under a [CC-BY 4.0 International license](#).

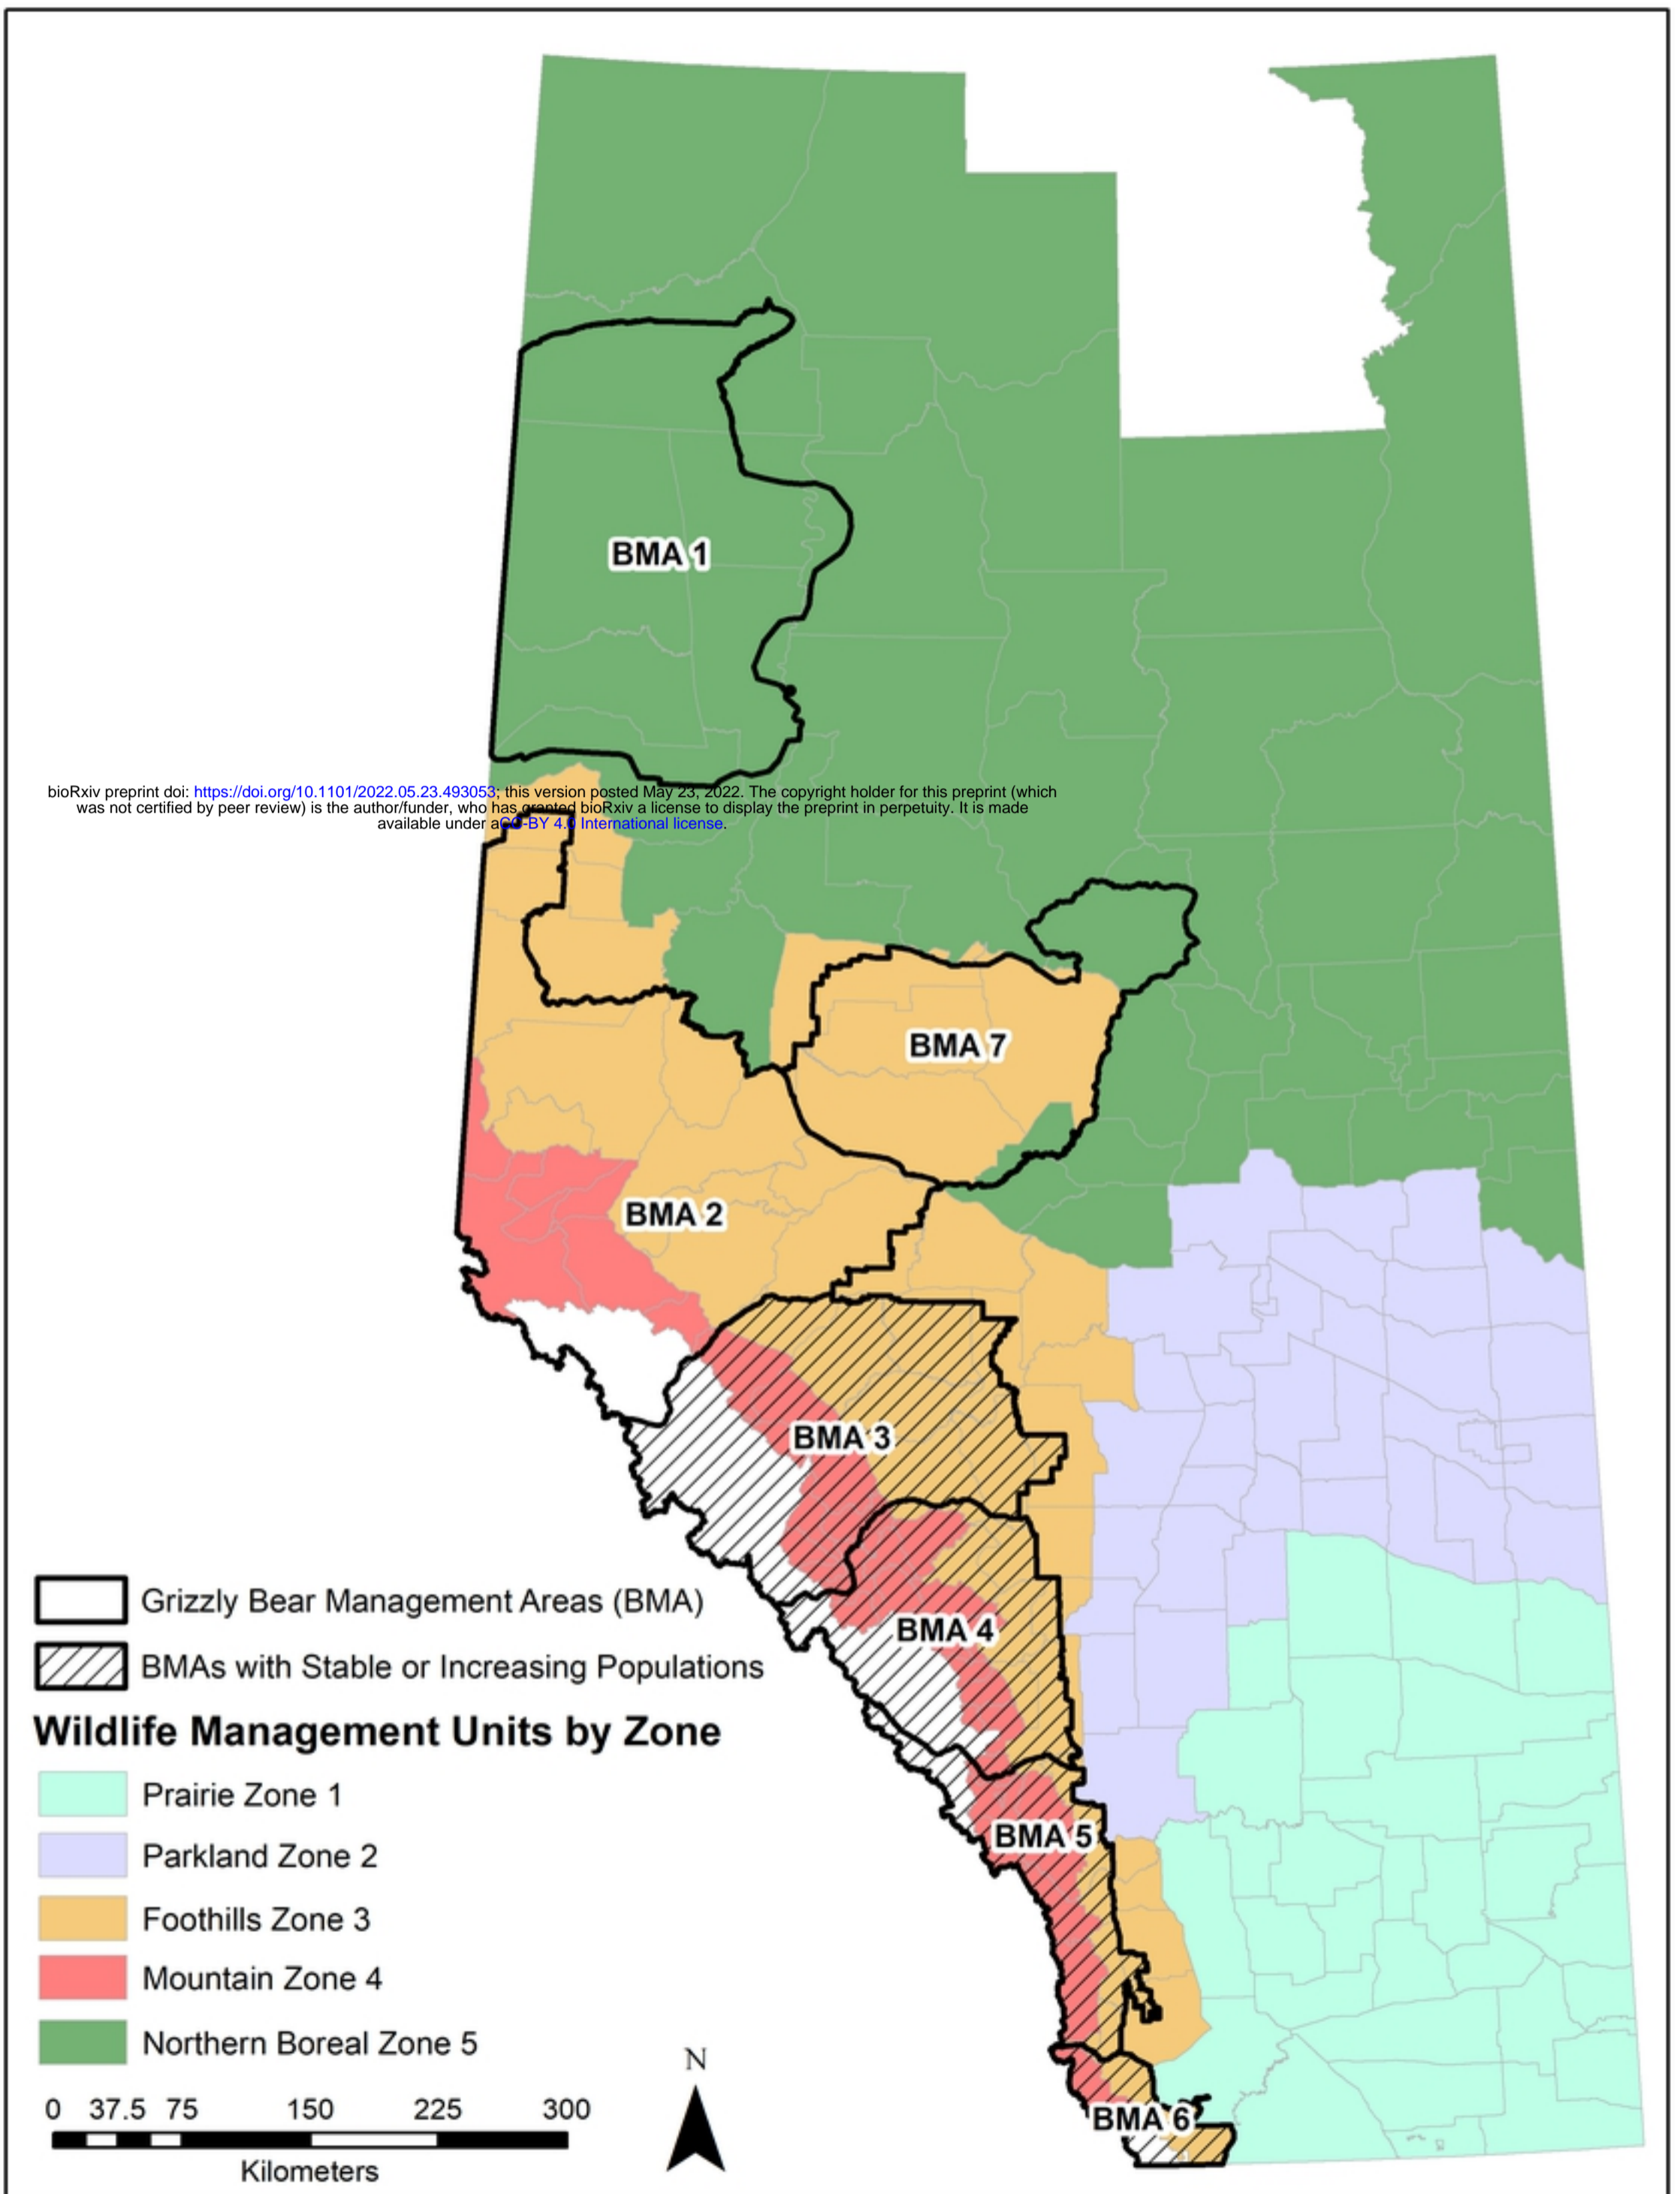

Figure 1

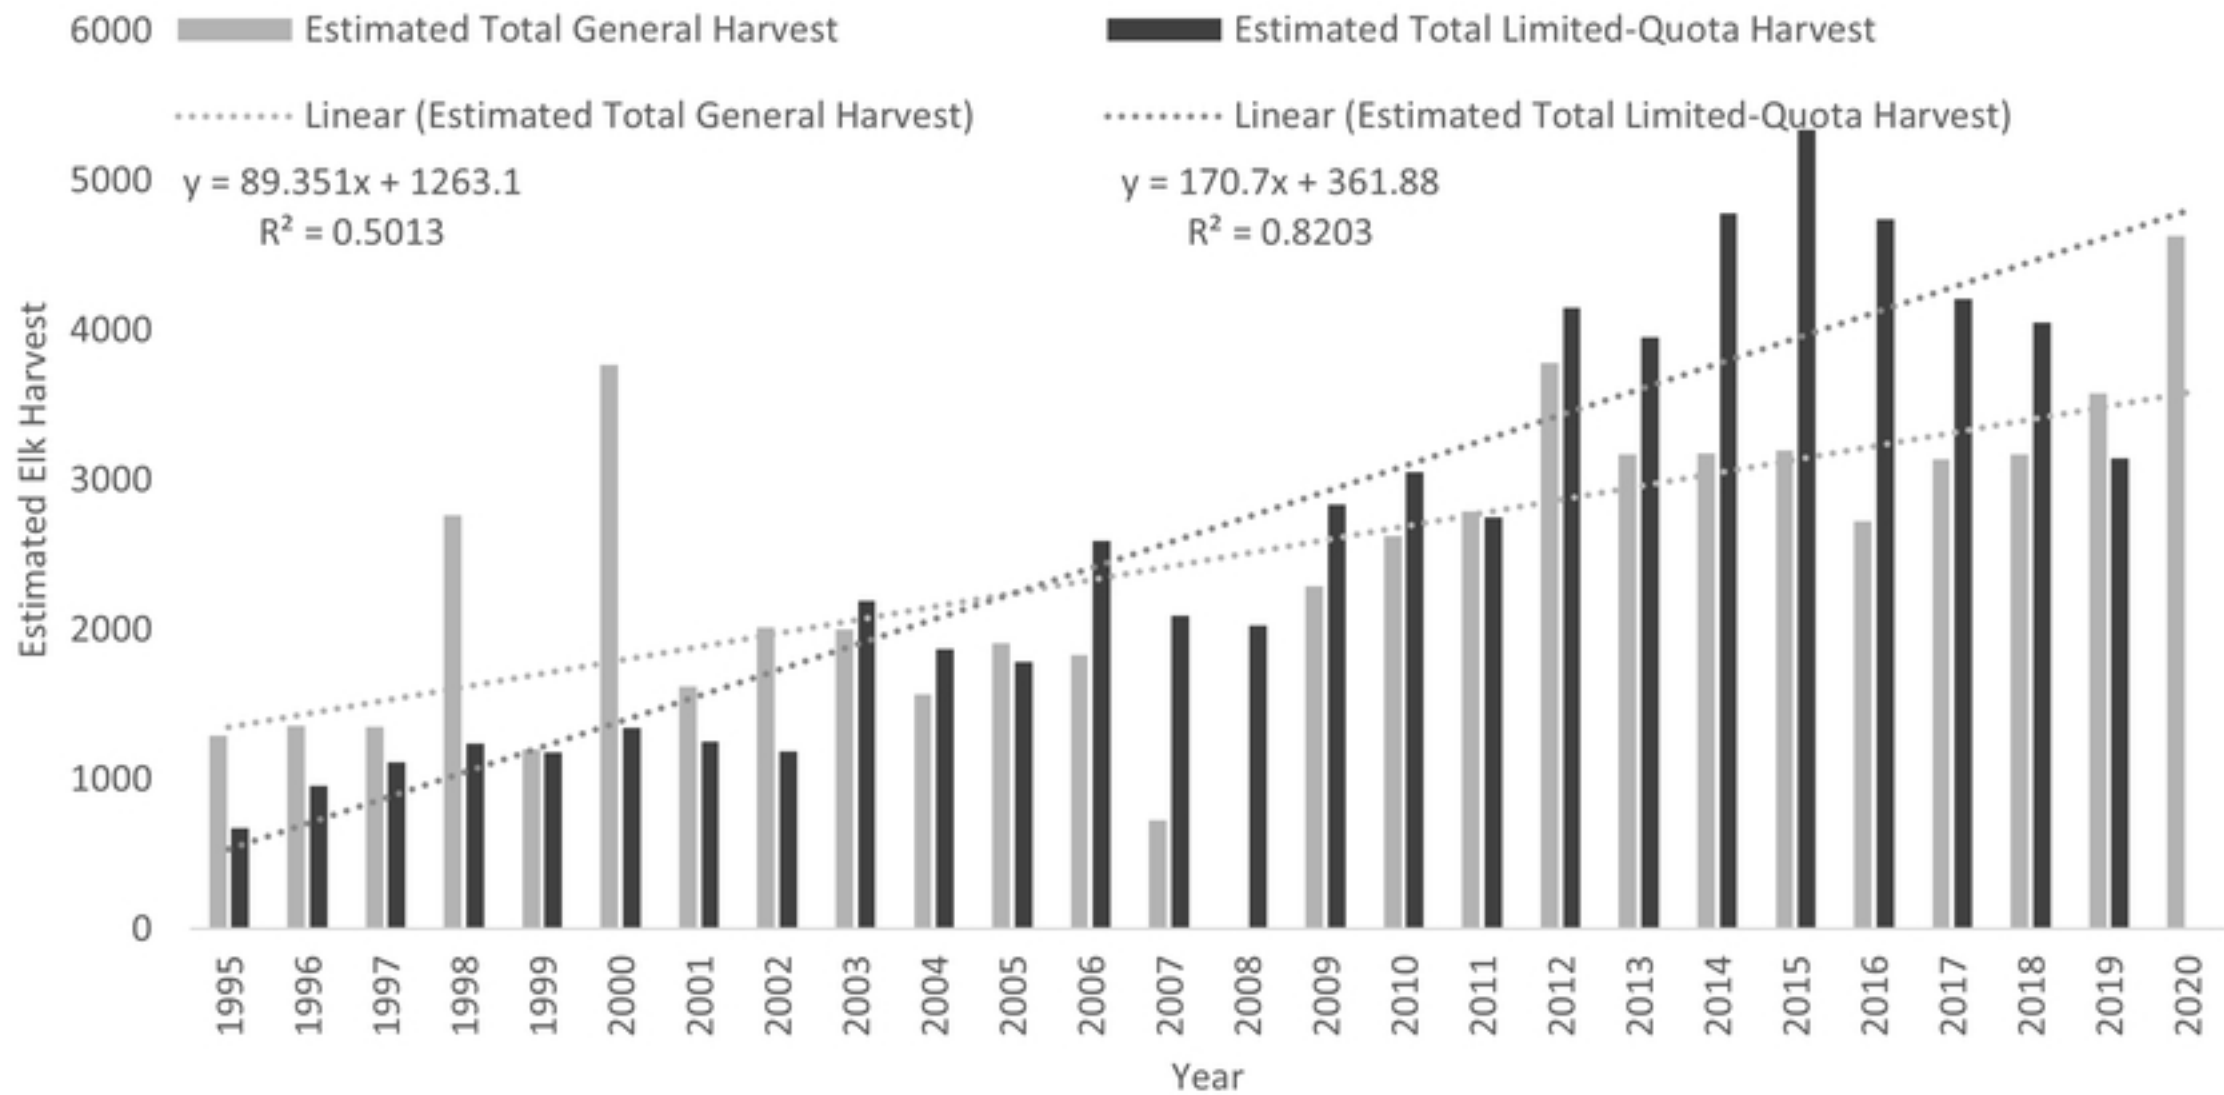

Figure 2

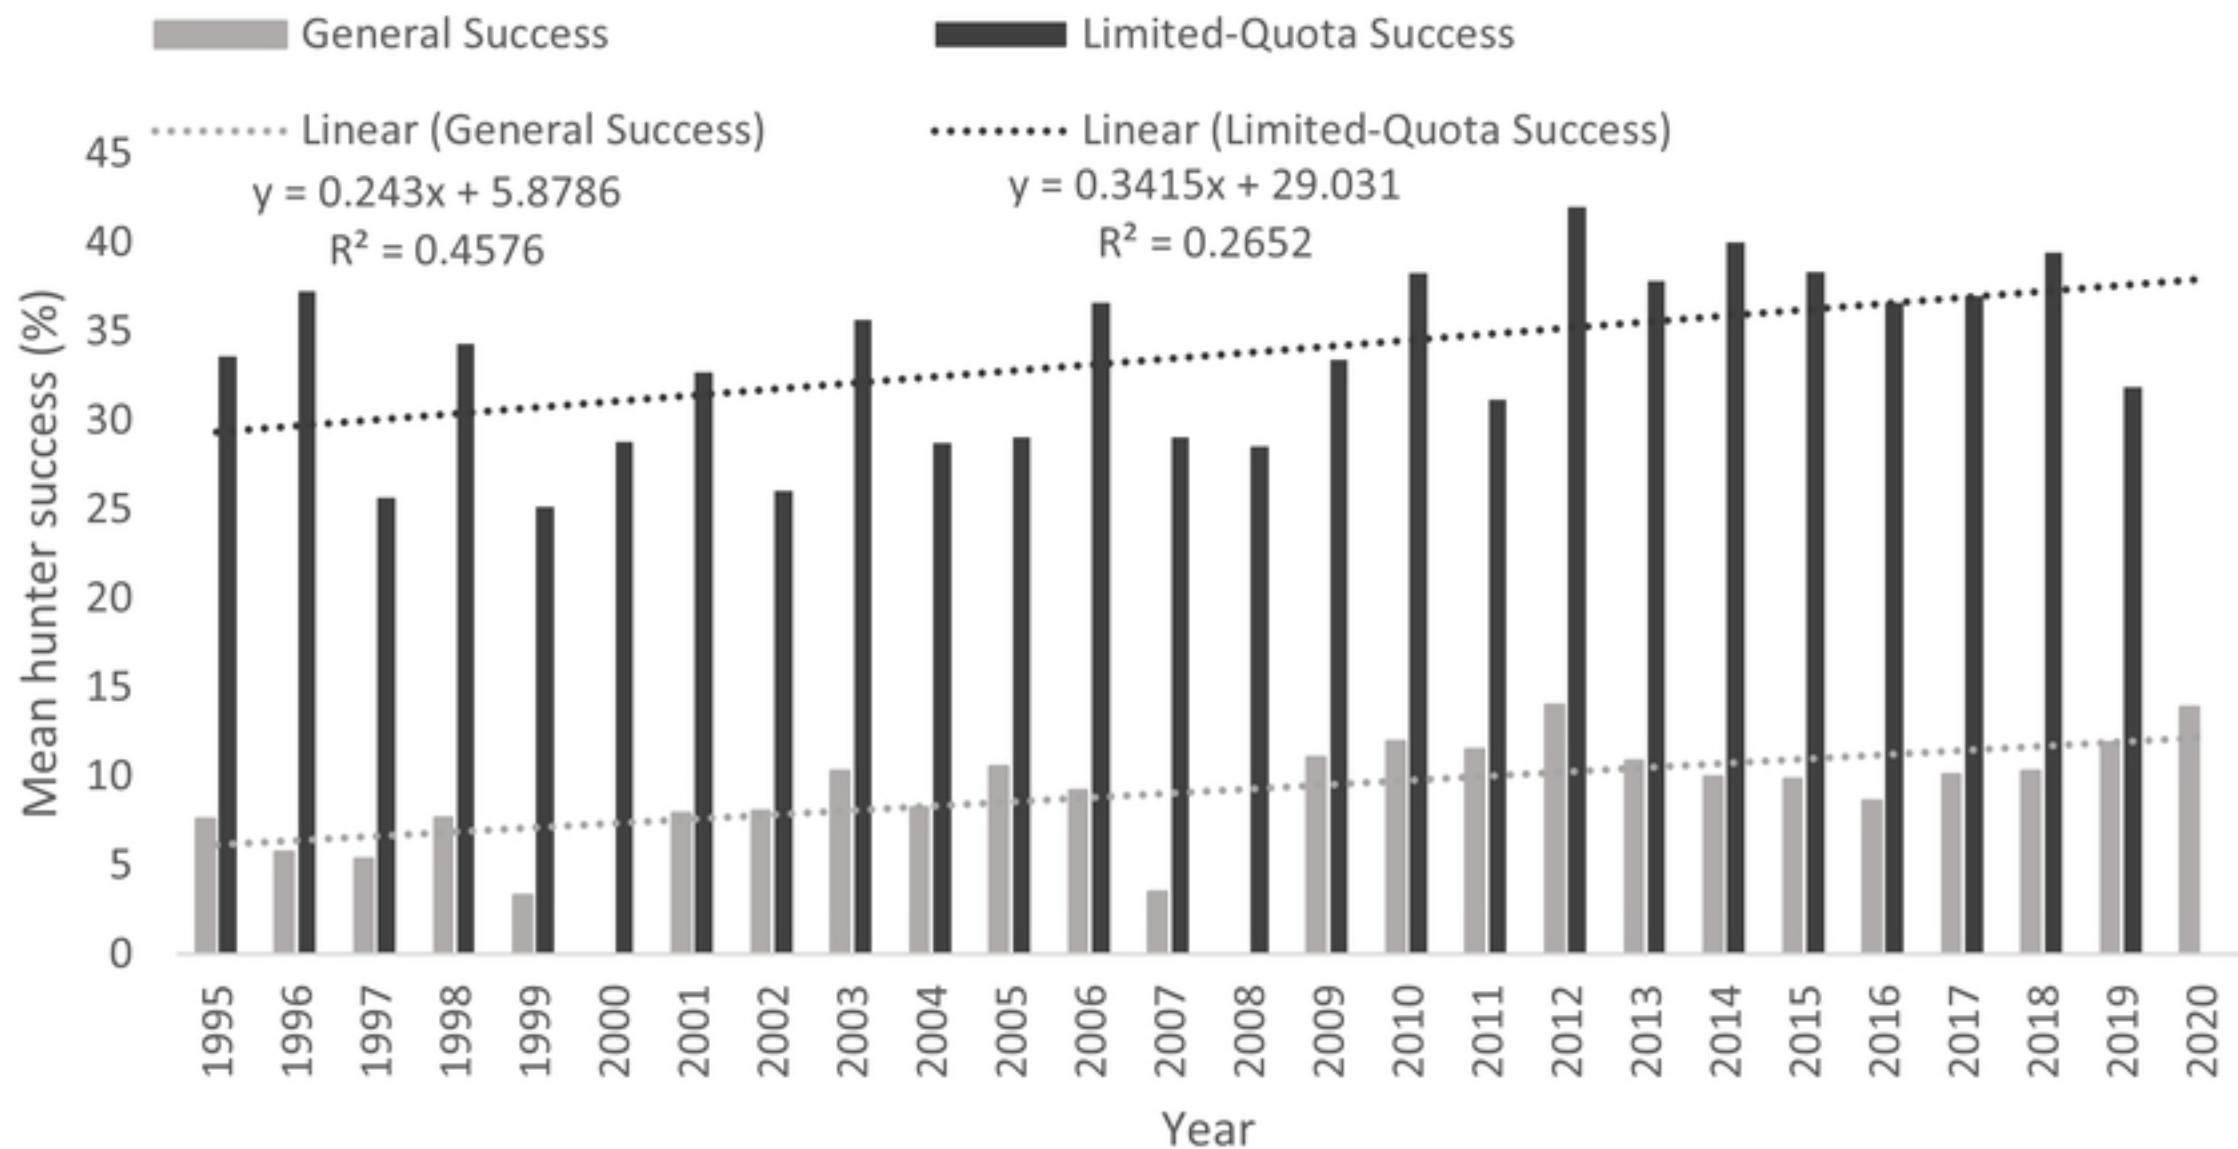

Figure 3

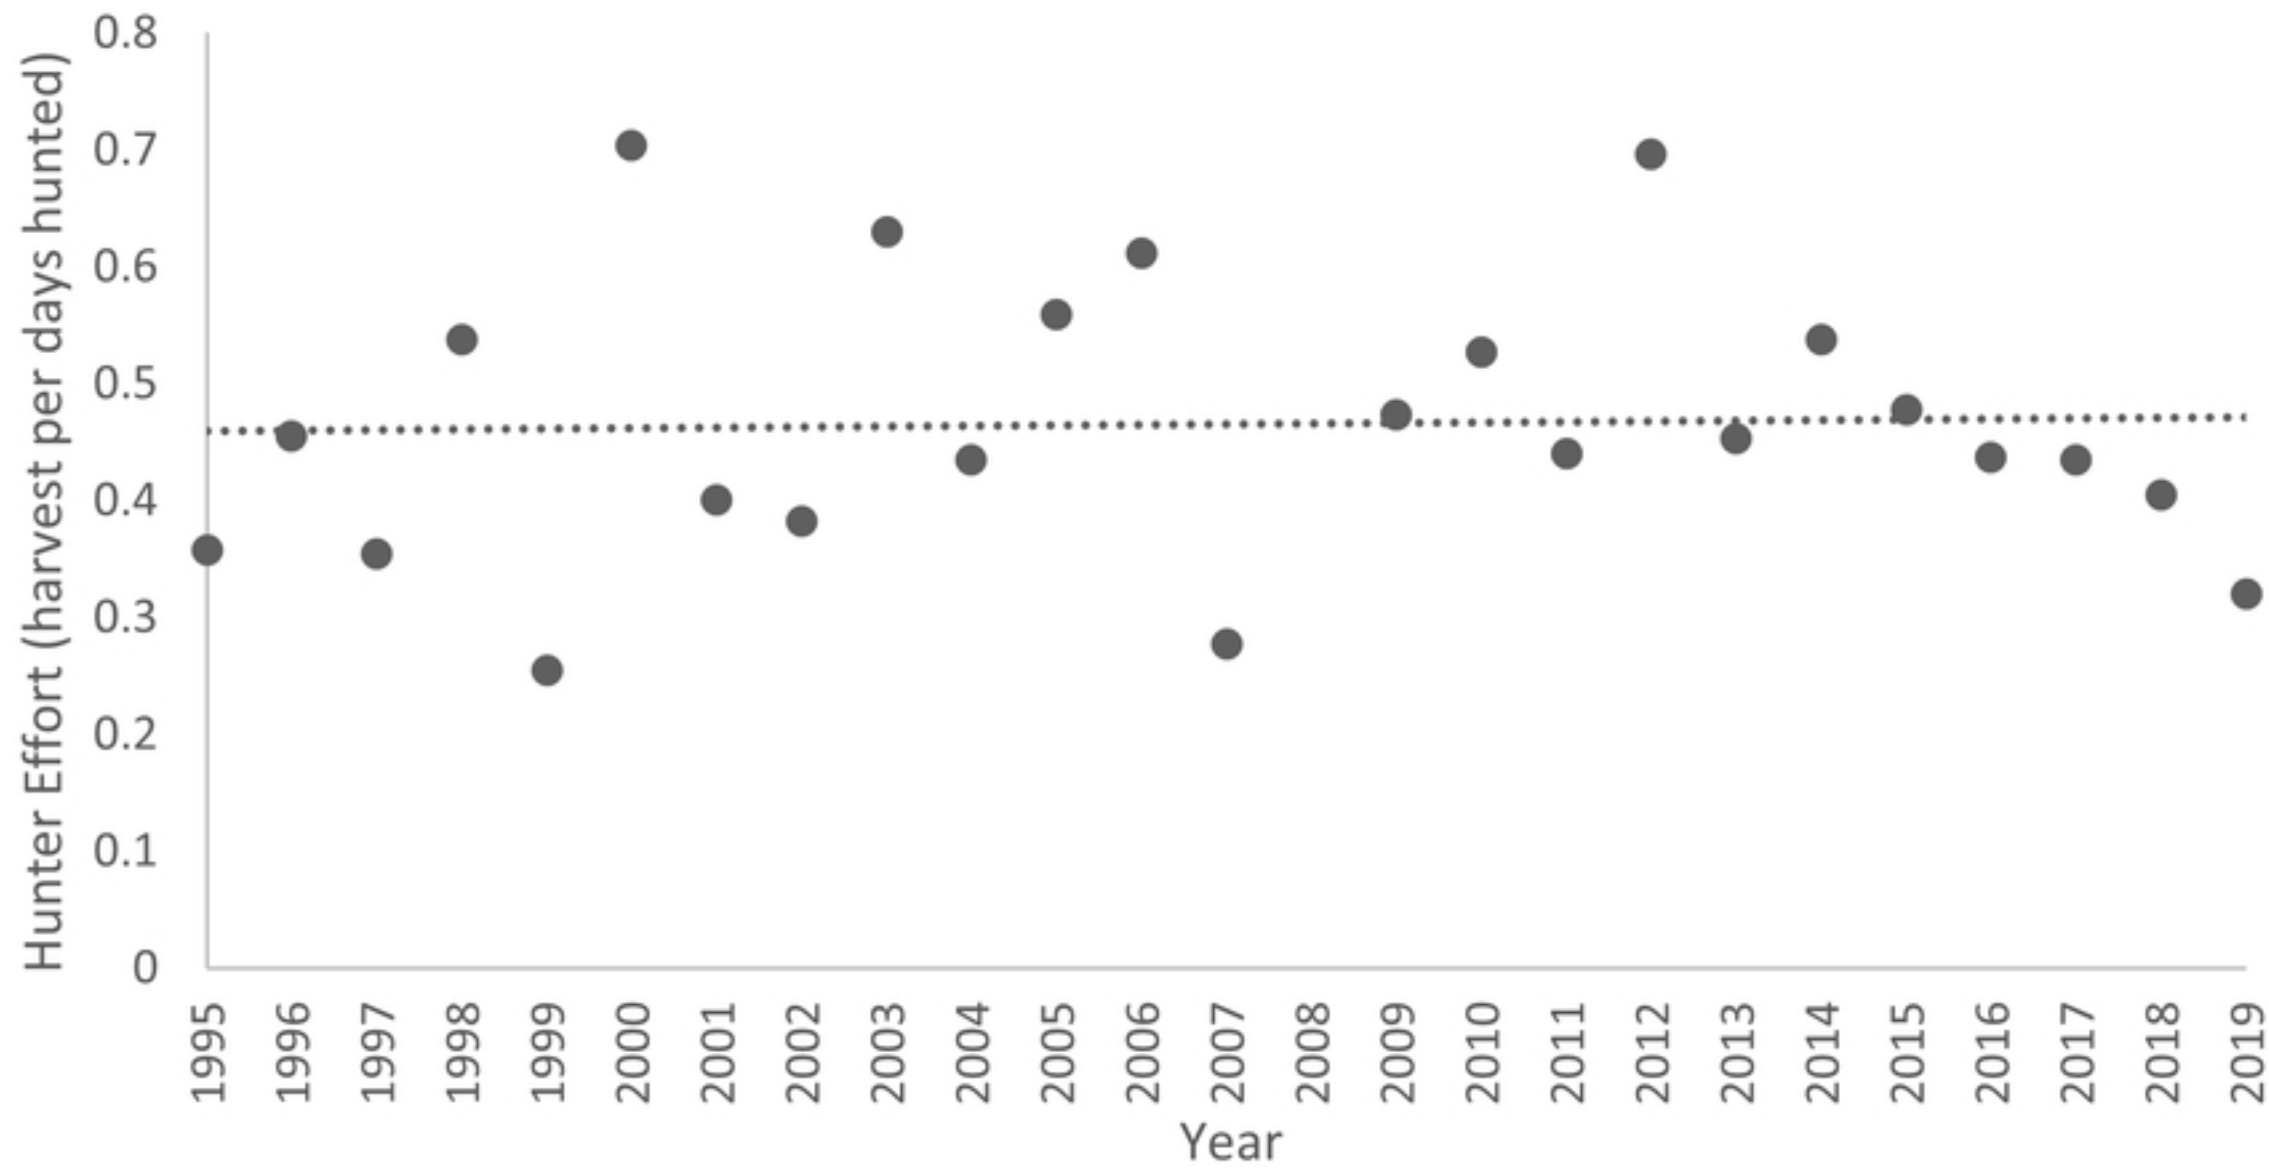

Figure 4
